# Supplementary material for: High social jetlag in healthy youth: Differences in tryptophan levels, temporal pole-centered gray matter volume, and functional connectivity
Source: Research Square preprint supplement (doi:10.21203/rs.3.rs-8431510/v1), 2026-02-20
Supplement: Supplementary file 1 [file 2bc0a7526e538ea718082a85.docx]

**Journal of Neural Transmission**

**High social jetlag in healthy youth: Differences in tryptophan levels, temporal pole-centered gray matter volume, and functional connectivity**

Masatoshi Yamashita1,2,*; Qiulu Shou1,2; Masanori Fujieda1,2,3; Hidehiko Okazawa2,4; Yoshiyuki Hirano2,5; Kuriko Kagitani-Shimono2; and Yoshifumi Mizuno1,2,3,#

***Corresponding author**

Masatoshi Yamashita, Research Center for Child Mental Development, University of Fukui, Fukui, Japan, email: [myamashita.fatiguepsychology@gmail.com](mailto:myamashita.fatiguepsychology@gmail.com)

#Co-corresponding author

Yoshifumi Mizuno, Research Center for Child Mental Development, University of Fukui, Fukui, Japan, email: [mizunoy@u-fukui.ac.jp](mailto:mizunoy@u-fukui.ac.jp)

Online Resource 2. Gray matter volume results

| Region | MNI co-ordinates (X, Y, Z) | Cluster size | T value | *p*-FWE |
| --- | --- | --- | --- | --- |
| Fusiform gyrus l | -38, -86, -22 | 55 | 4.19 | 0.003 |
| Temporal pole l | -54, 6, -15 | 96 | 3.95 | 0.011 |
| Superior parietal lobule l | 46, -40, -32 | 20 | 3.91 | 0.013 |
| Angular gyrus r | 39, -60, 27 | 14 | 3.76 | 0.026 |
| Inferior temporal gyrus r | -32, -72, 52 | 5 | 3.67 | 0.039 |

FWE, family wise error; l, left; MNI, Montreal Neurological Institute; r, right.
