# Supplementary material for: High social jetlag in healthy youth: Differences in tryptophan levels, temporal pole-centered gray matter volume, and functional connectivity
Source: Research Square preprint supplement (doi:10.21203/rs.3.rs-8431510/v1), 2026-02-20
Supplement: Supplementary file 2 [file 4ee3d61ea301e69bbd480433.docx]

**Journal of Neural Transmission**

**High social jetlag in healthy youth: Differences in tryptophan levels, temporal pole-centered gray matter volume, and functional connectivity​**

Masatoshi Yamashita1,2,*; Qiulu Shou1,2; Masanori Fujieda1,2,3; Hidehiko Okazawa2,4; Yoshiyuki Hirano2,5; Kuriko Kagitani-Shimono2; and Yoshifumi Mizuno1,2,3,#

***Corresponding author**

Masatoshi Yamashita, Research Center for Child Mental Development, University of Fukui, Fukui, Japan, email: [myamashita.fatiguepsychology@gmail.com](mailto:myamashita.fatiguepsychology@gmail.com)

**#Co-corresponding author**

Yoshifumi Mizuno, Research Center for Child Mental Development, University of Fukui, Fukui, Japan, email: [mizunoy@u-fukui.ac.jp](mailto:mizunoy@u-fukui.ac.jp)

**Online Resource 1: Exploratory mediation analysis**

Based on significant group differences in urinary tryptophan levels, temporal pole gray matter volume (GMV), and temporal pole-pars triangularis functional connectivity (FC; see the Results section in the main text), we conducted an exploratory mediation analysis to test whether tryptophan mediated the association between social jetlag (SJL; high = 1 vs. low = 0) and the aforementioned GMV or FC. First, tryptophan concentration, GMV, and FC were re-estimated using linear mixed-effect models to adjust for random effects and covariates. These measures were then converted to z-scores. Furthermore, we conducted a standard mediation analysis (R package “lavaan”) to estimate the significance of the mediating effect by using the bias-corrected bootstrap approach with 10,000 resamples.
