# Supplementary material for: High social jetlag in healthy youth: Differences in tryptophan levels, temporal pole-centered gray matter volume, and functional connectivity
Source: Research Square preprint supplement (doi:10.21203/rs.3.rs-8431510/v1), 2026-02-20
Supplement: Supplementary file 4 [file 8e04c0cac445e249da8f4984.docx]

**Journal of Neural Transmission**

**High social jetlag in healthy youth: Differences in tryptophan levels, temporal pole-centered gray matter volume, and functional connectivity​**

Masatoshi Yamashita1,2,*; Qiulu Shou1,2; Masanori Fujieda1,2,3; Hidehiko Okazawa2,4; Yoshiyuki Hirano2,5; Kuriko Kagitani-Shimono2; and Yoshifumi Mizuno1,2,3,#

***Corresponding author**

Masatoshi Yamashita, Research Center for Child Mental Development, University of Fukui, Fukui, Japan, email: [myamashita.fatiguepsychology@gmail.com](mailto:myamashita.fatiguepsychology@gmail.com)

#Co-corresponding author

Yoshifumi Mizuno, Research Center for Child Mental Development, University of Fukui, Fukui, Japan, email: [mizunoy@u-fukui.ac.jp](mailto:mizunoy@u-fukui.ac.jp)

Online Resource 3. Seed-to-voxel analysis results

| Region | MNI coordinates (X, Y, Z) | Cluster size | T value | *p*-FWE |
| --- | --- | --- | --- | --- |
| Pars triangularis r | 52, 28, 16 | 319 | 4.40 | 0.009 |

FWE, family wise error; r, right; MNI, Montreal Neurological Institute.
